# Supplementary figures and images for: Long-Distance Transportation Causes Temperature Stress in the Honey Bee, Apis mellifera (Hymenoptera: Apidae)
Source: PubMed Central journal article supplement — Environ Entomol. 2019 Mar 30;48(3):691–701. doi: 10.1093/ee/nvz027 (PMC6554651; doi:10.1093/ee/nvz027), 2019-03-30

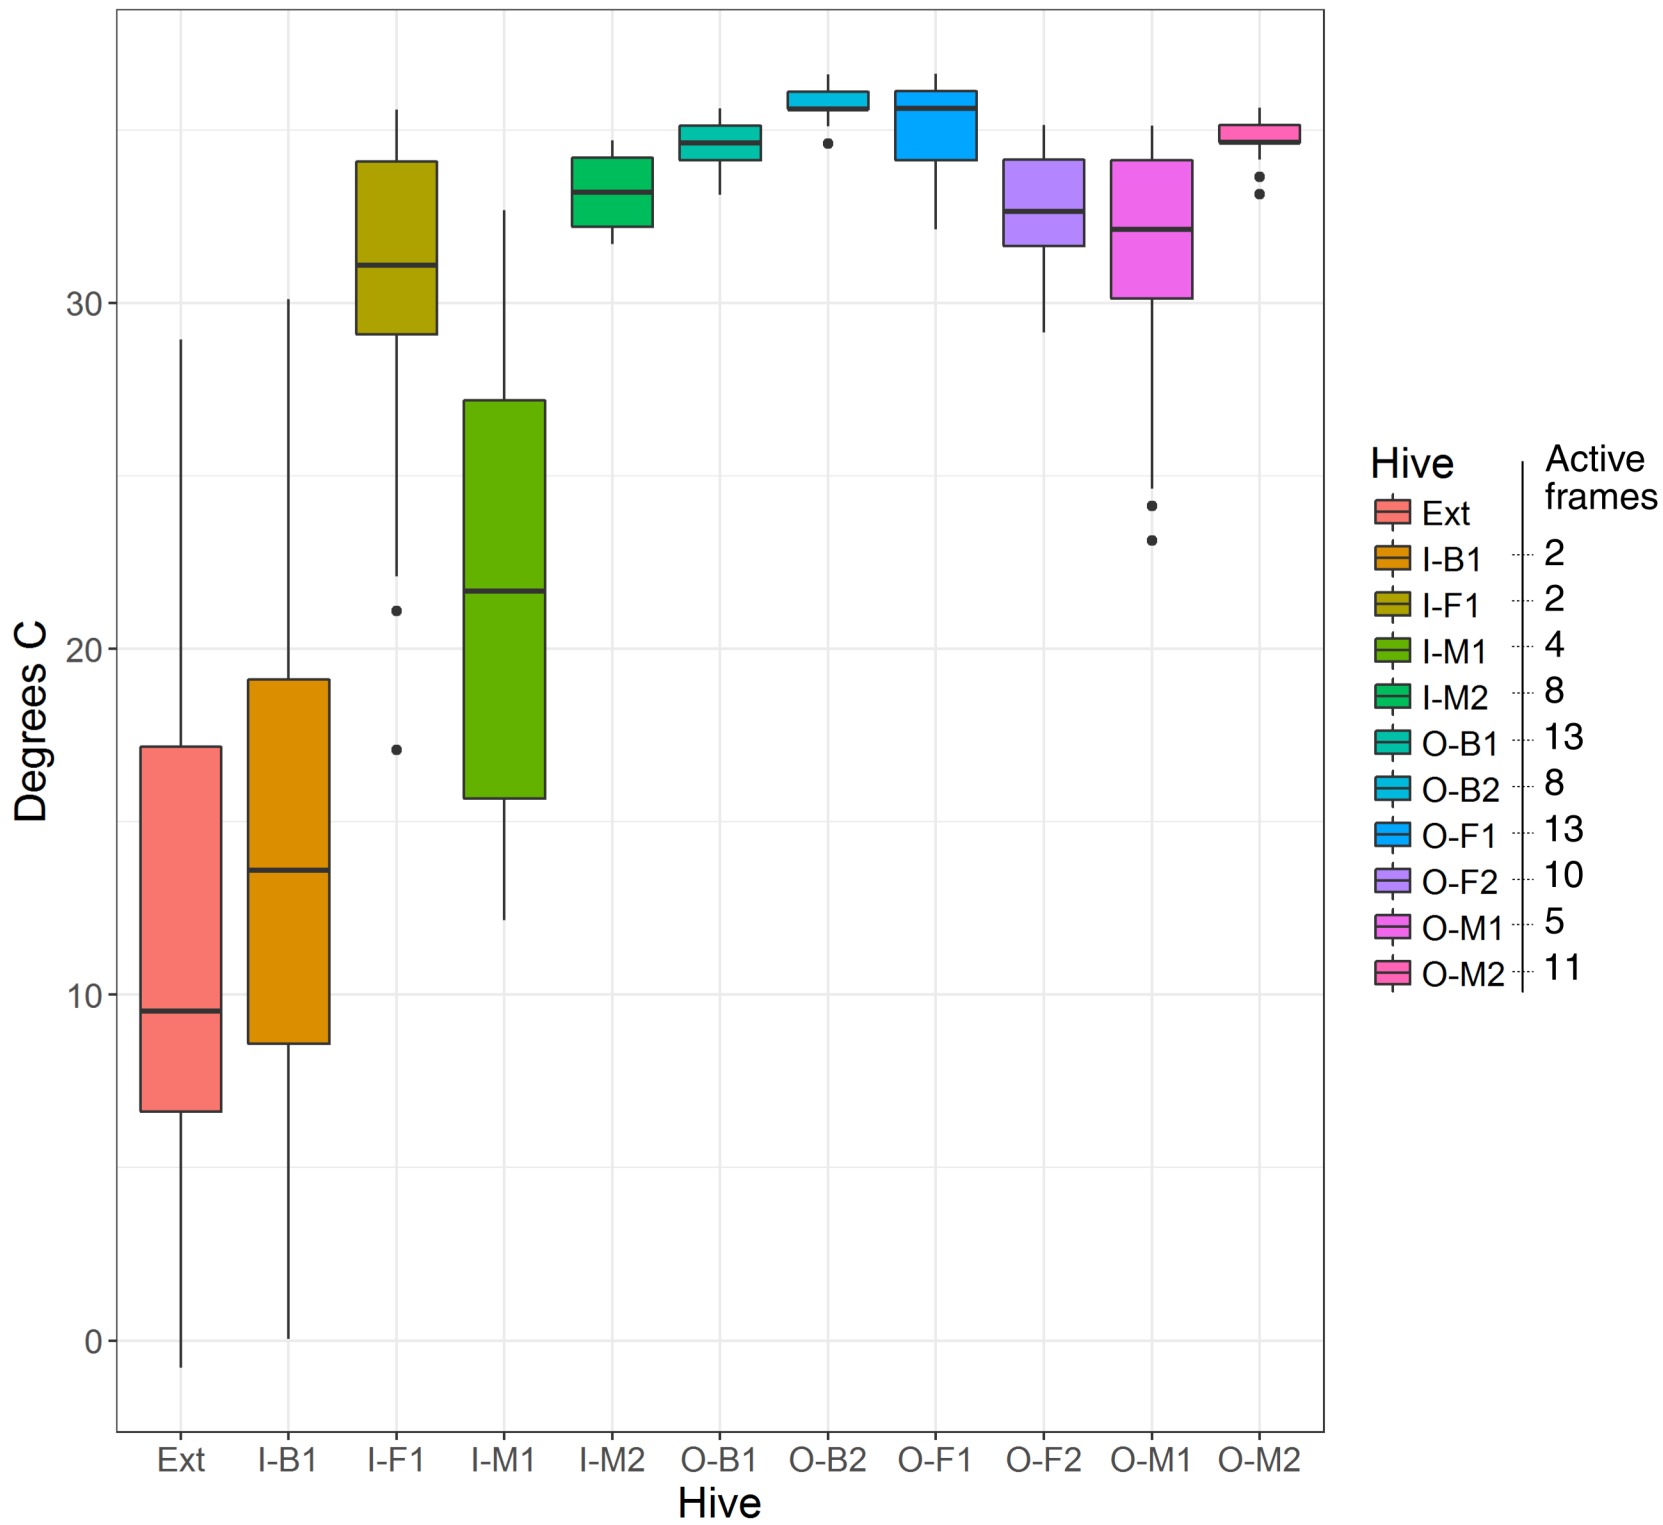

Supplement: nvz027_suppl_supplementary_figure-s1.pdf [file nvz027_suppl_supplementary_figure-s1.pdf]

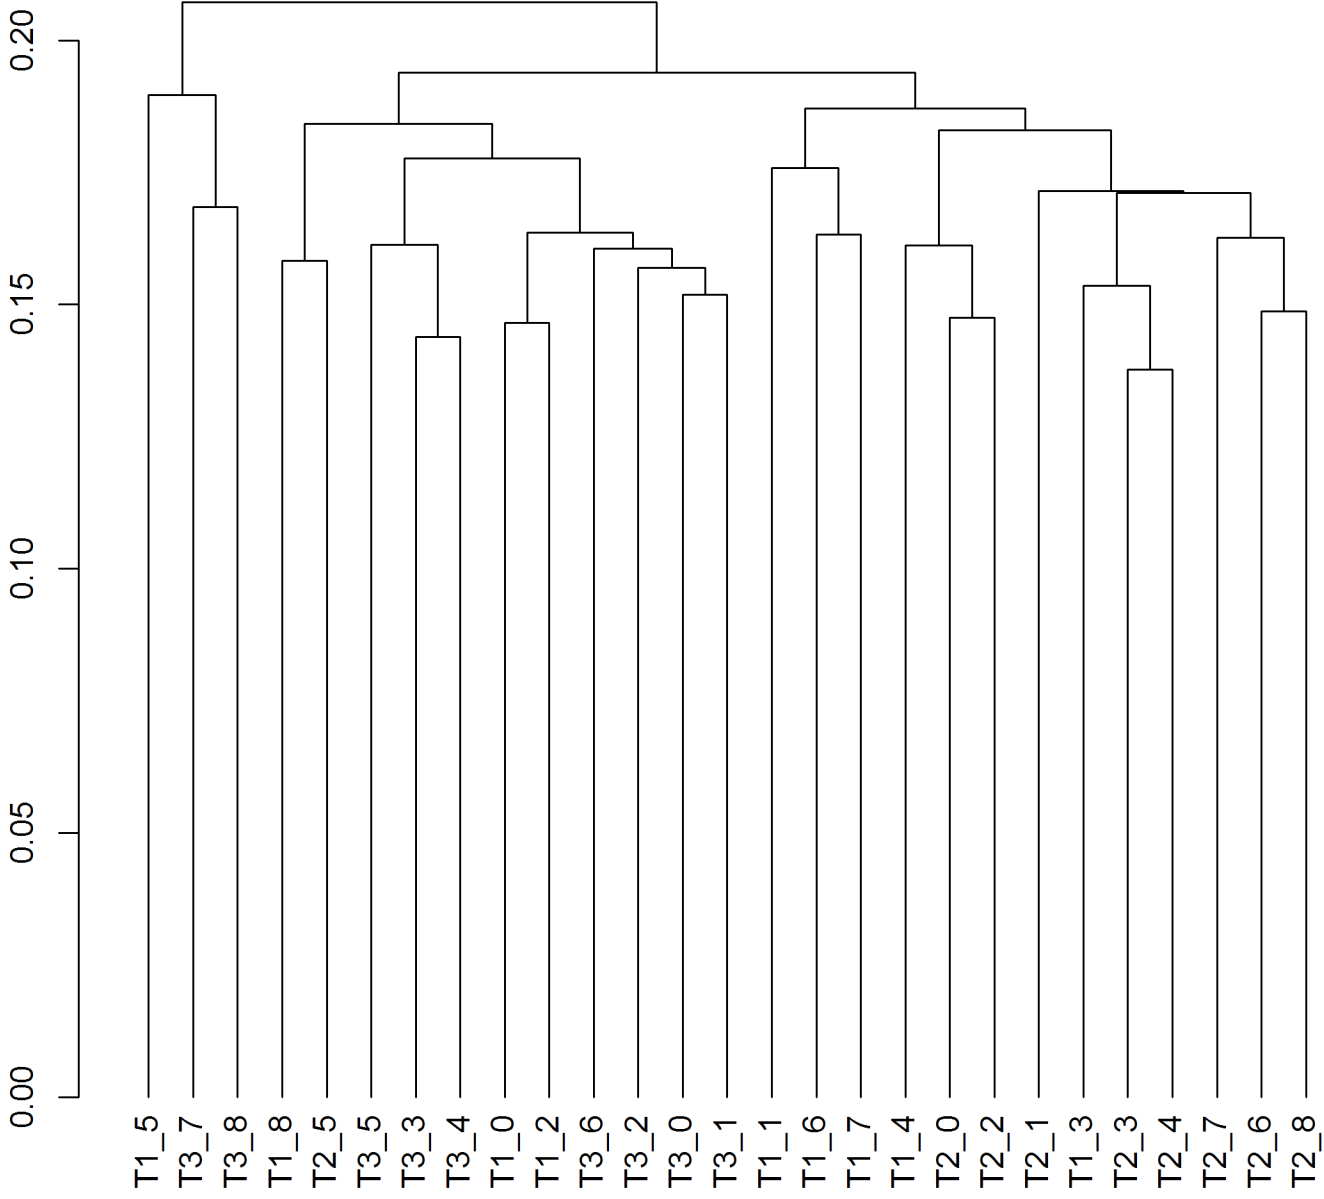

Supplement: nvz027_suppl_supplementary_figure-s2.pdf [file nvz027_suppl_supplementary_figure-s2.pdf]

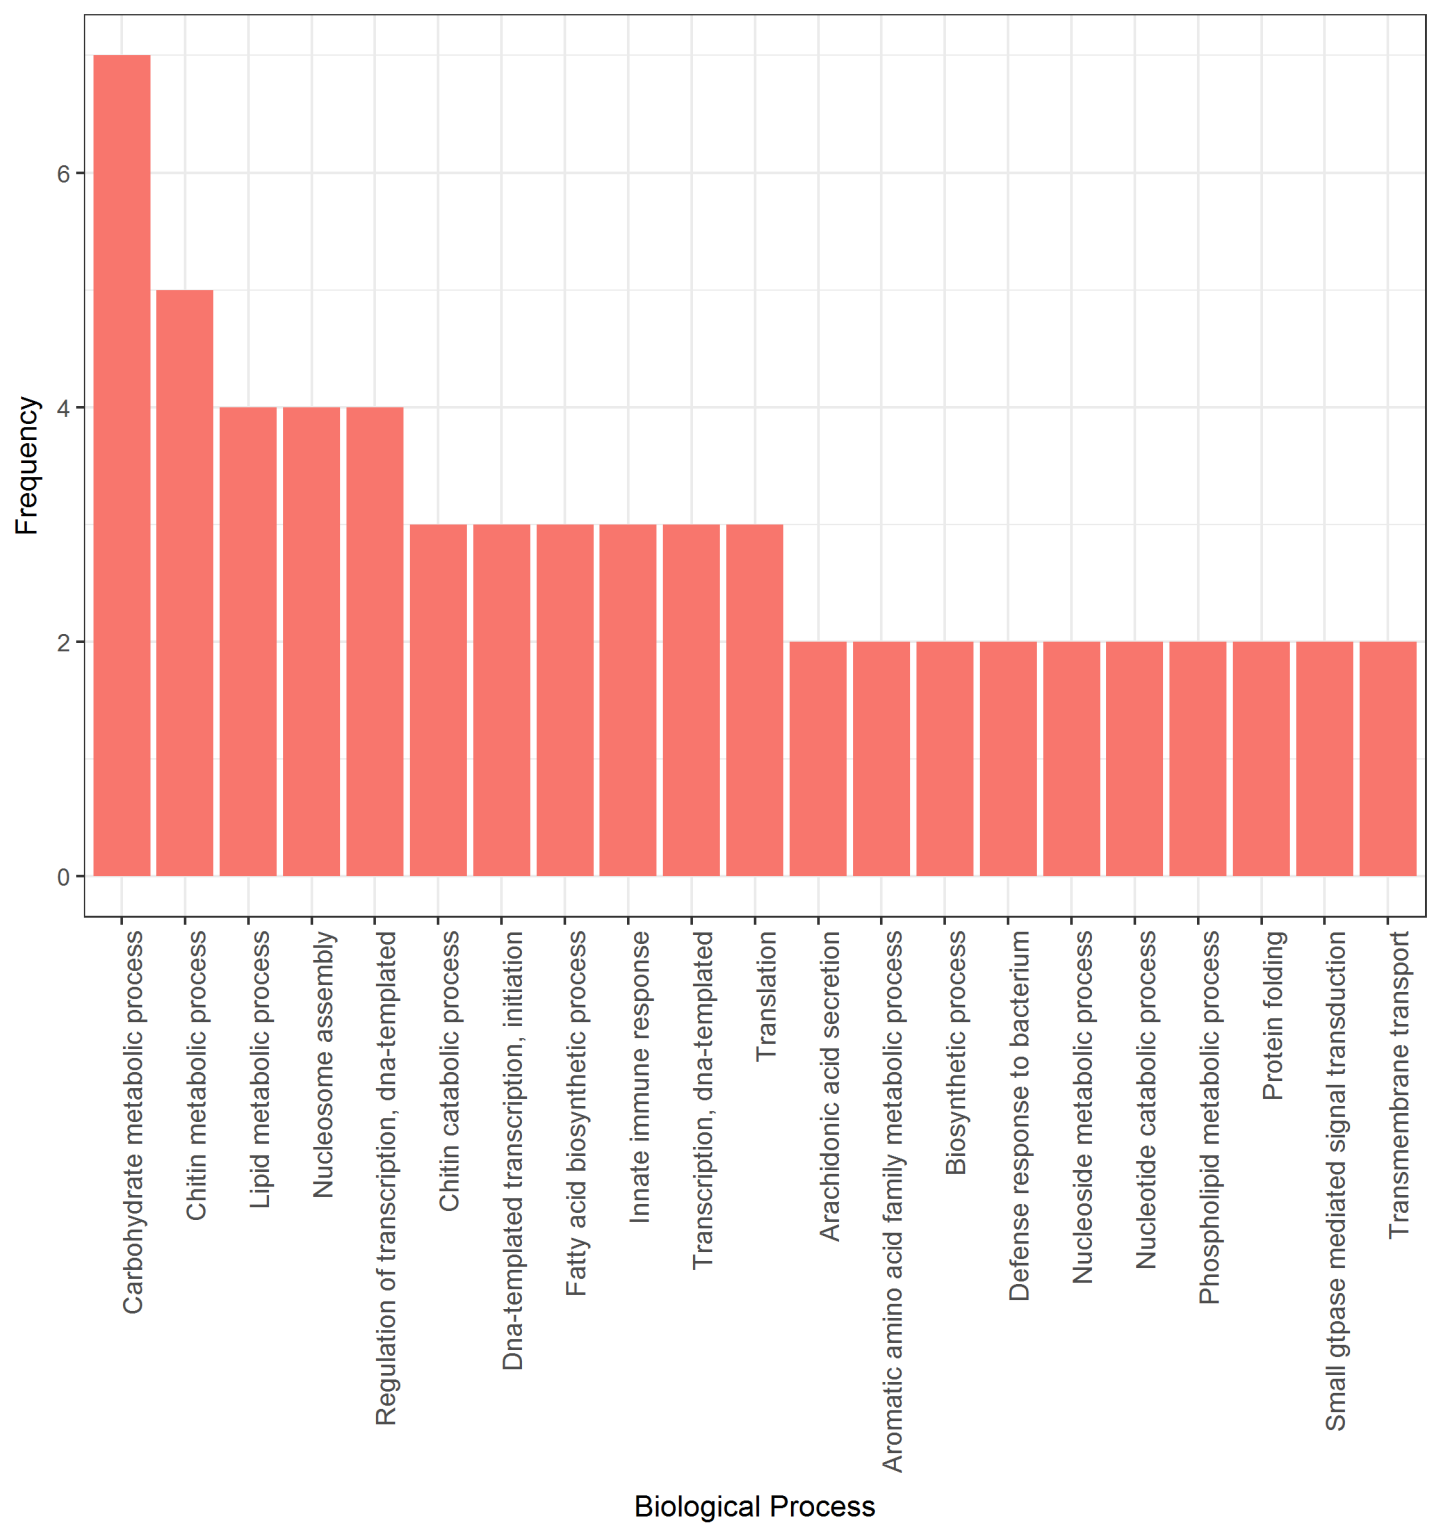

Supplement: nvz027_suppl_supplementary_figure-s3.pdf [file nvz027_suppl_supplementary_figure-s3.pdf]

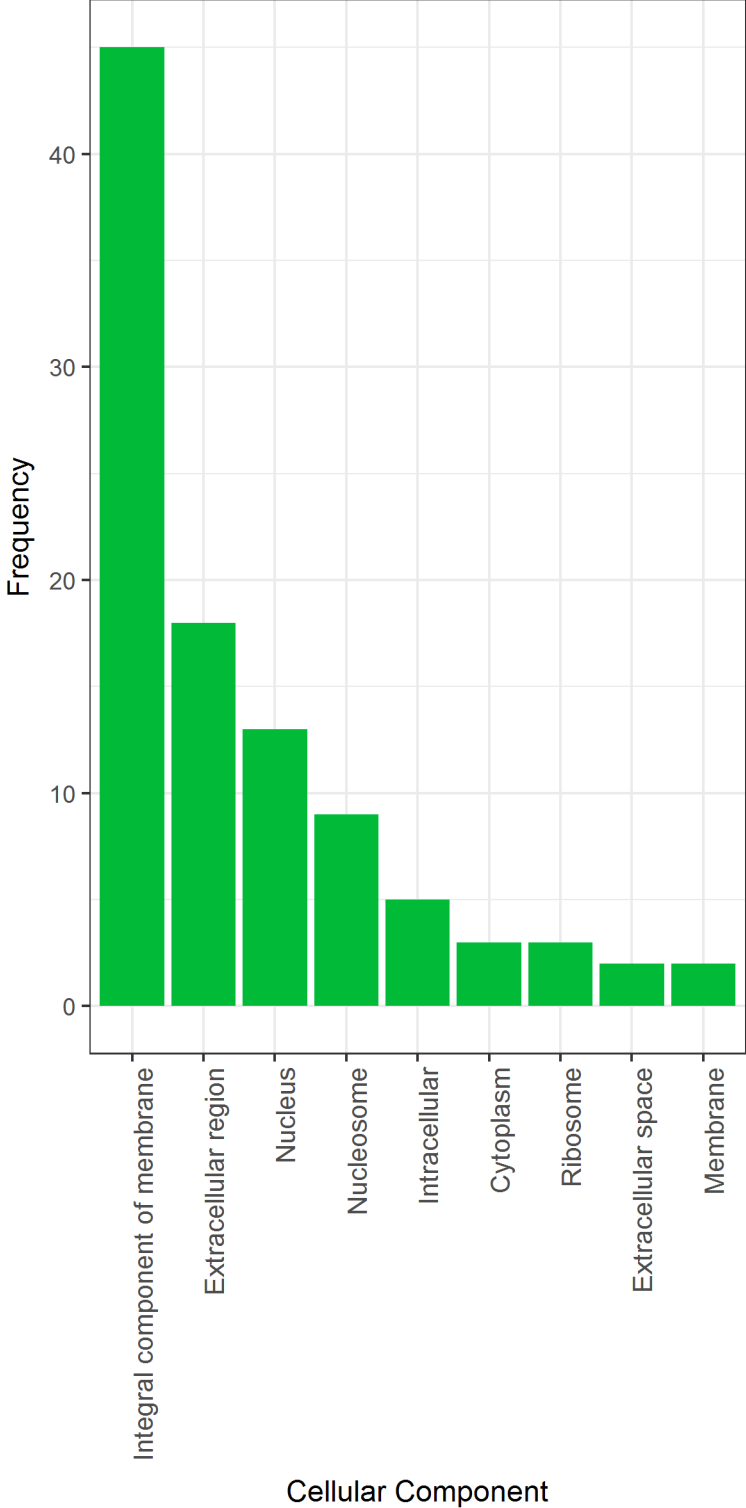

Supplement: nvz027_suppl_supplementary_figure-s4.pdf [file nvz027_suppl_supplementary_figure-s4.pdf]

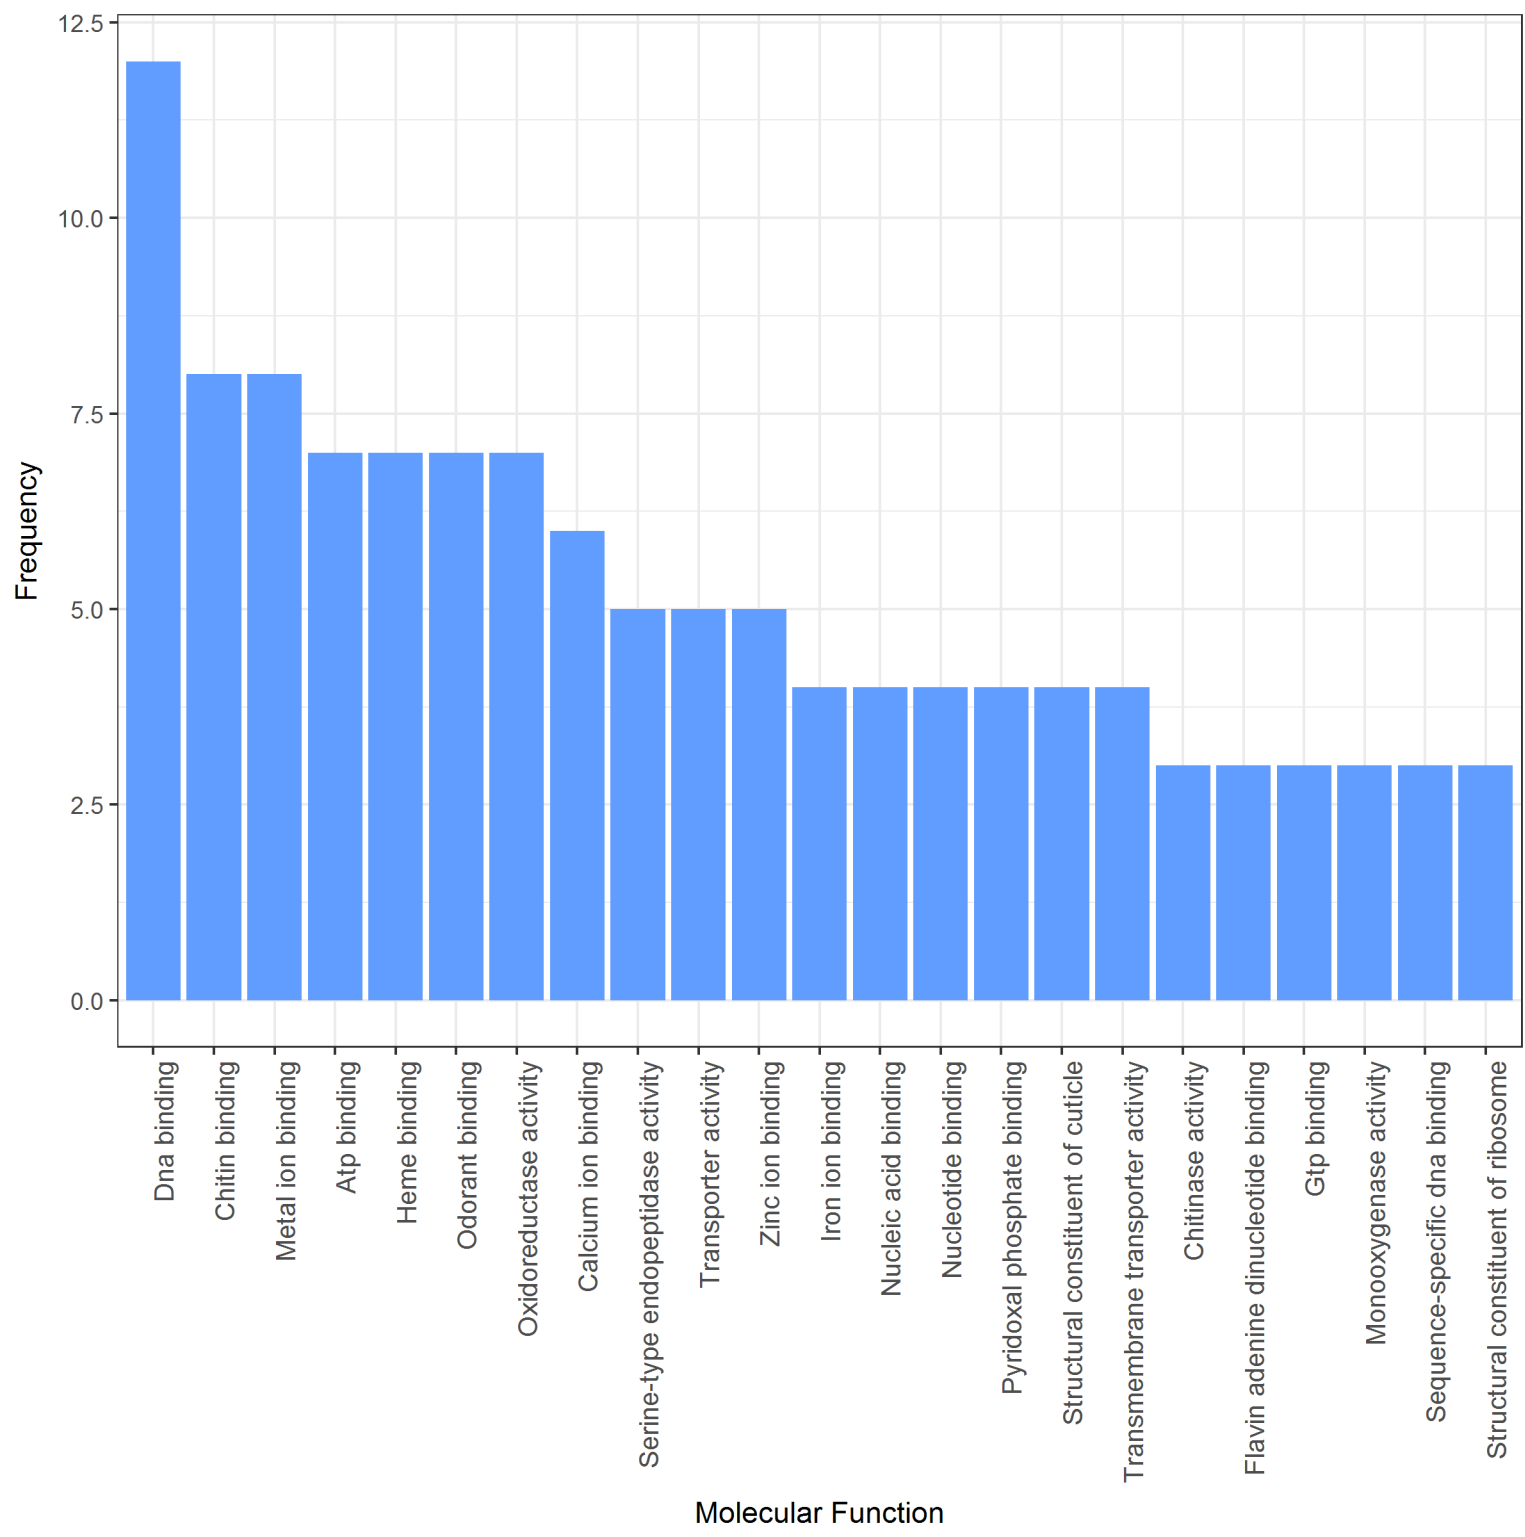

Supplement: nvz027_suppl_supplementary_figure-s5.pdf [file nvz027_suppl_supplementary_figure-s5.pdf]
